# Supplementary material
Source: Research Square preprint supplement (doi:10.21203/rs.3.rs-8934367/v1)

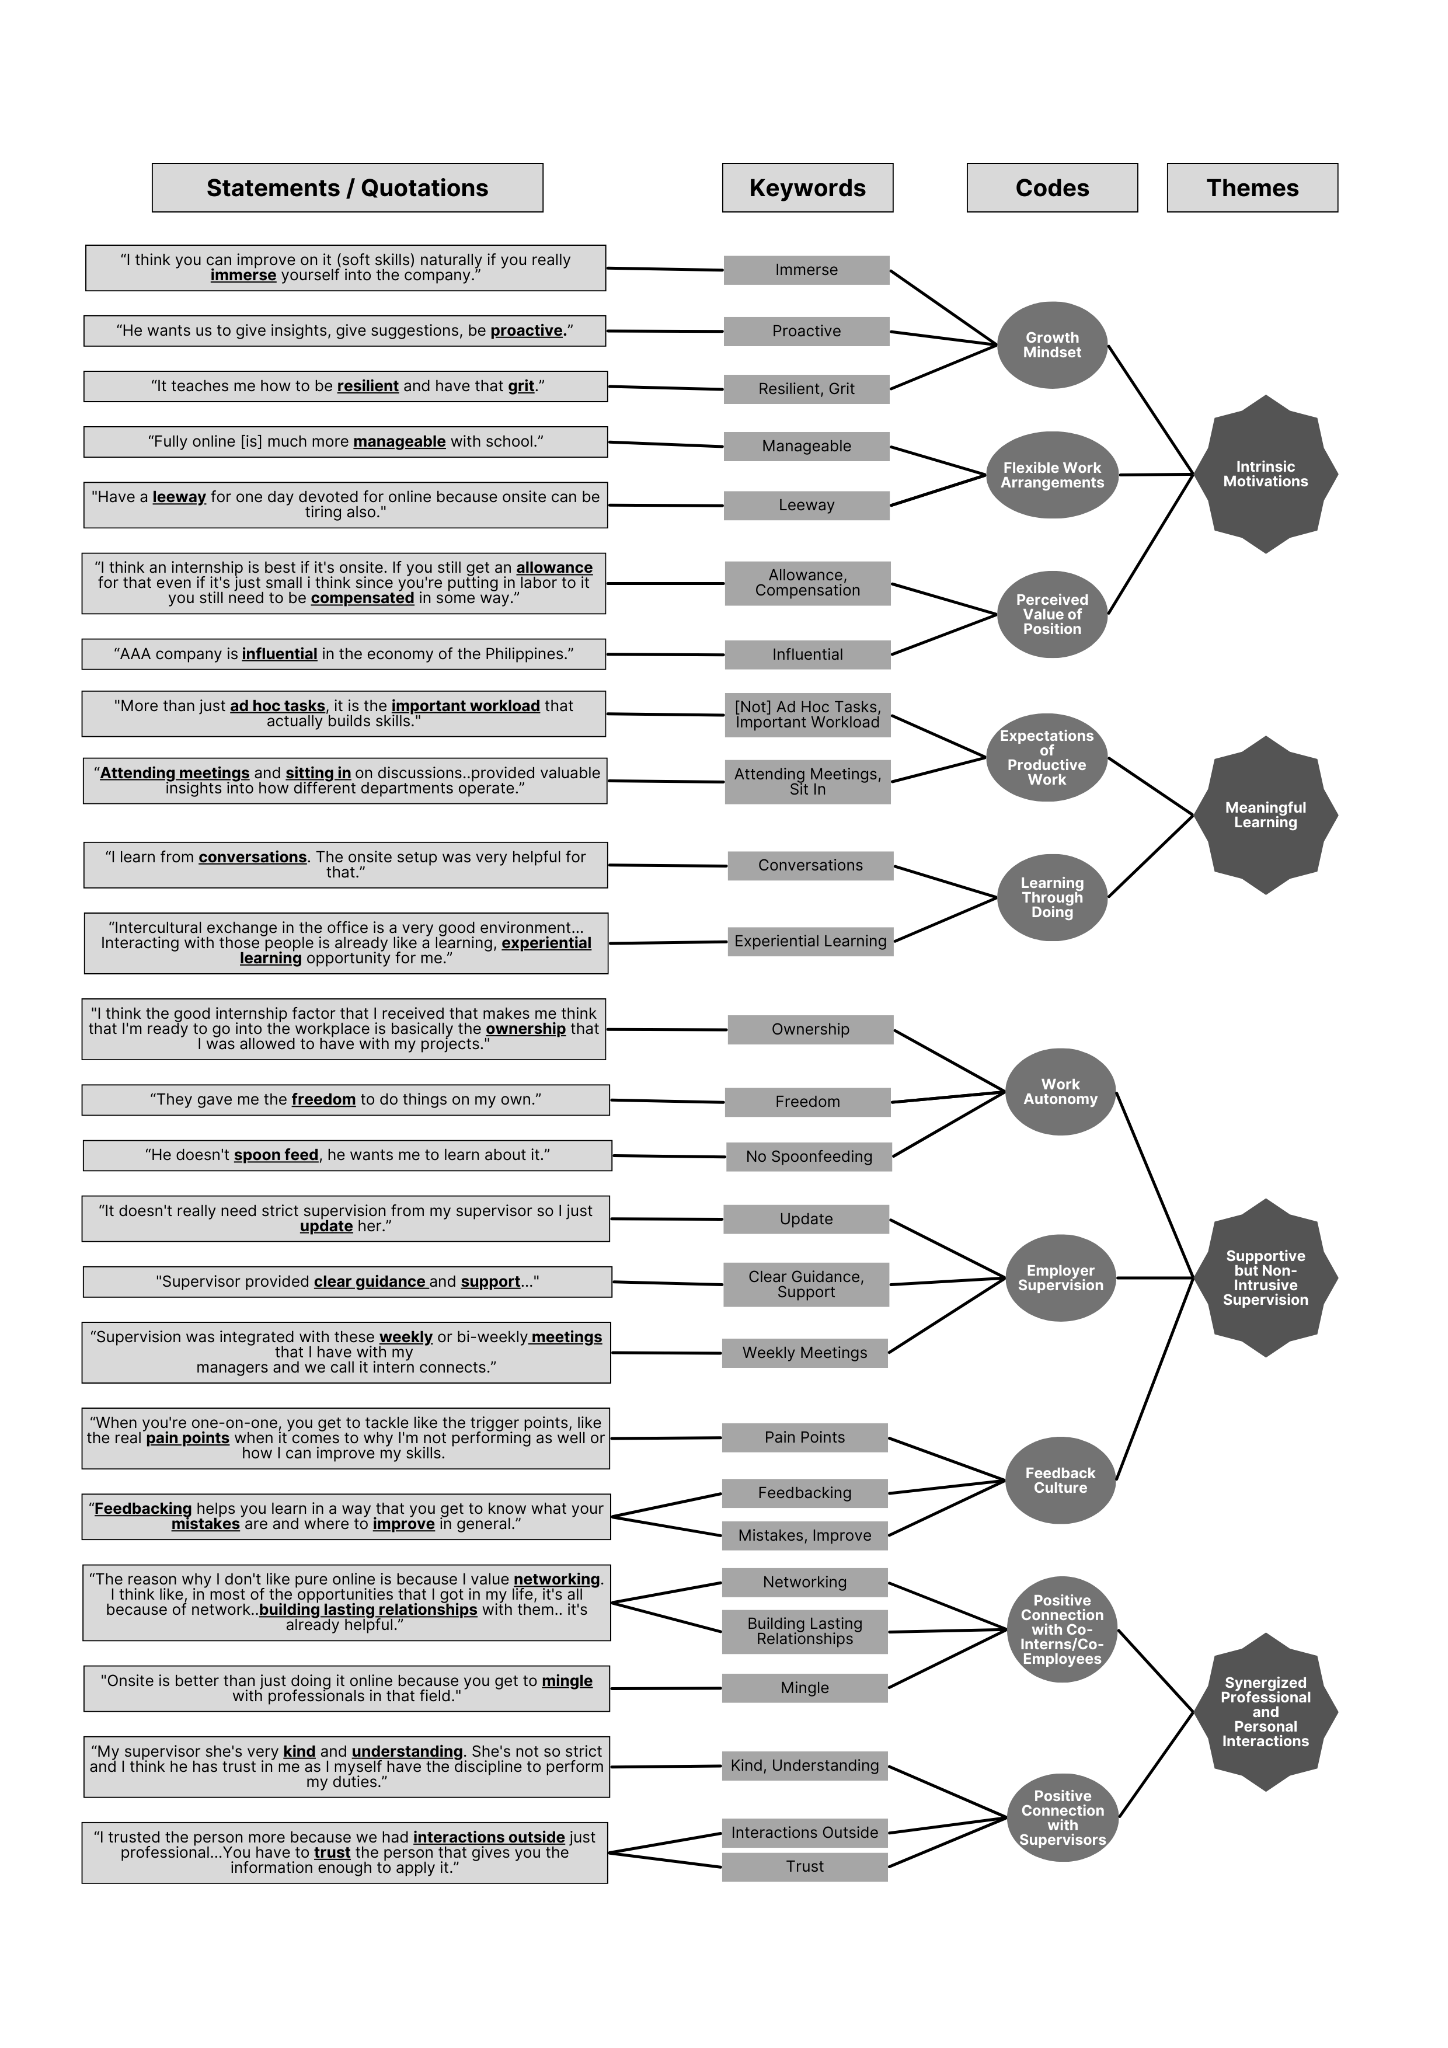

Supplement: Supplementary file 1 [file 3b61b13342686d9c405a687a.docx]
